# Supplementary material
Source: Springer Nature journal article supplement (https://www.springermedizin.de/resource/supplementary/13054_2013_2879_MOESM5_ESM.pdf/9714092)
Supplement: MOESM5 [file 9714092]

|                                                                                                                                | Clifton 1993                                                              | Clifton 2011                     | Clifton 2001                                                                                                             | Gal 2002                                | Hashiguchi 2003                                                                                                                                      | Jiang 2000 | Lee 2010 | Liu 2006 | Marion 1997      | Smrcka 2005      | Zhao 2011 | Zhi 2003         | Maekawa 2009 | Guo 2004         | Guo 2004         | Guo 2004         | Guo 2004         | Guo 2004         | Guo 2004 |                  |
|--------------------------------------------------------------------------------------------------------------------------------|---------------------------------------------------------------------------|----------------------------------|--------------------------------------------------------------------------------------------------------------------------|-----------------------------------------|------------------------------------------------------------------------------------------------------------------------------------------------------|------------|----------|----------|------------------|------------------|-----------|------------------|--------------|------------------|------------------|------------------|------------------|------------------|----------|------------------|
| Has the control group been managed to normothermia?                                                                            | Yes                                                                       | Yes                              | Yes                                                                                                                      | Yes                                     | Yes                                                                                                                                                  | Yes        | Yes      | Yes      | Yes              | Yes              | Yes       | Yes              | Yes          | Yes              | Yes              | Yes              | Yes              | Yes              | Yes      | Yes              |
| Yes = 1, No = 0, NS=0                                                                                                          | 1                                                                         | 1                                | 1                                                                                                                        | 1                                       | 1                                                                                                                                                    | 1          | 1        | 1        | 1                | 1                | 1         | 1                | 1            | 1                | 1                | 1                | 1                | 1                | 1        | 1                |
| Were the control group actively warmed on admission if hyperthermic?                                                           | NS                                                                        | No                               | NS                                                                                                                       | No but cooled to 36.5-37.5 if necessary | No (before randomisation 5 patients were given mild hypothermia (34°C) as their ICP could not be maintained below 20mmHg using conventional therapy) | NS         | NS       | NS       | NS               | NS               | NS        | Yes              | NS           | No               | NS               | NS               | NS               | NS               | NS       | NS               |
| Yes = 0, No = 2, NS=1                                                                                                          | 1                                                                         | 2                                | 1                                                                                                                        | 2                                       | 2                                                                                                                                                    | 1          | 1        | 1        | 2                | 1                | 1         | 0                | 1            | 2                | 1                | 1                | 1                | 1                | 1        | 1                |
| Has the treatment arm received barbiturates in addition to therapeutic hypothermia?                                            | No                                                                        | NS                               | Barbiturate coma was induced in patients whose intracranial pressure remained high                                       | No                                      | Yes                                                                                                                                                  | No         | NS       | NS       | NS               | NS               | NS        | NS               | NS           | No               | Yes              | Yes              | Yes              | Yes              | No       | No               |
| Yes = 0, No = 2, NS=1                                                                                                          | 2                                                                         | 1                                | 0                                                                                                                        | 2                                       | 0                                                                                                                                                    | 2          | 1        | 1        | 1                | 1                | 1         | 1                | 1            | 2                | 0                | 0                | 0                | 0                | 2        | 2                |
| Are there significant differences between the treatment and control sample populations?                                        | No                                                                        | Yes                              | No                                                                                                                       | No                                      | Yes                                                                                                                                                  | No         | No       | No       | No               | No               | Yes       | Yes              | NS           | No               | No               | No               | No               | No               | No       | NS               |
| Yes = 0, No = 1, NS=0                                                                                                          | 1                                                                         | 0                                | 1                                                                                                                        | 1                                       | 0                                                                                                                                                    | 1          | 1        | 1        | 1                | 1                | 0         | 0                | 0            | 1                | 1                | 1                | 1                | 1                | 1        | 0                |
| Has the 'standard treatment' that the control group received been clearly outlined?                                            | Yes                                                                       | Yes                              | Yes                                                                                                                      | Yes                                     | Yes                                                                                                                                                  | No         | Yes      | No       | Yes              | No               | Yes       | Yes              | No           | Yes              | Yes              | No               | Yes              | Yes              | No       | Yes              |
| Yes = 1, No = 0                                                                                                                | 1                                                                         | 1                                | 1                                                                                                                        | 1                                       | 1                                                                                                                                                    | 0          | 1        | 0        | 1                | 0                | 1         | 1                | 0            | 1                | 1                | 0                | 1                | 0                | 1        | 1                |
| Adequacy of allocation concealment?                                                                                            | Unclear                                                                   | Adequate                         | Unclear                                                                                                                  | Inadequate                              | Unclear                                                                                                                                              | Unclear    | Unclear  | Unclear  | Adequate         | Unclear          | Unclear   | Unclear          | Unclear      | Unclear          | Adequate         | Unclear          | Unclear          | Unclear          | Unclear  | Unclear          |
| Adequate = 1, Inadequate & Unclear = 0                                                                                         | 0                                                                         | 1                                | 0                                                                                                                        | 0                                       | 0                                                                                                                                                    | 0          | 0        | 0        | 1                | 0                | 0         | 0                | 0            | 0                | 1                | 0                | 0                | 0                | 0        | 0                |
| Blinding of investigators                                                                                                      | NS                                                                        | No                               | NS                                                                                                                       | NS                                      | NS                                                                                                                                                   | NS         | NS       | NS       | NS               | NS               | NS        | NS               | NS           | No               | No               | NS               | No               | NS               | NS       | NS               |
| Yes = 1, No = 0, NS=0                                                                                                          | 0                                                                         | 0                                | 0                                                                                                                        | 0                                       | 0                                                                                                                                                    | 0          | 0        | 0        | 0                | 0                | 0         | 0                | 0            | 0                | 0                | 0                | 0                | 0                | 0        | 0                |
| Blinding of participants                                                                                                       | NS                                                                        | No                               | NS                                                                                                                       | NS                                      | NS                                                                                                                                                   | NS         | NS       | NS       | NS               | NS               | NS        | NS               | NS           | No               | NS               | NS               | Yes              | NS               | NS       | NS               |
| Yes = 1, No = 0, NS=0                                                                                                          | 0                                                                         | 0                                | 0                                                                                                                        | 0                                       | 0                                                                                                                                                    | 0          | 0        | 0        | 0                | 0                | 0         | 0                | 0            | 0                | 0                | 0                | 0                | 0                | 0        | 0                |
| Blinding of outcome assessor                                                                                                   | GOS was assessed by a neuropsychologist who was blinded to treatment arm. | Yes                              | Yes                                                                                                                      | NS                                      | NS                                                                                                                                                   | Yes        | NS       | NS       | NS               | NS               | NS        | NS               | NS           | NS               | Yes              | NS               | NS               | NS               | NS       | NS               |
| Yes = 1, No = 0, NS=0                                                                                                          | 1                                                                         | 1                                | 1                                                                                                                        | 0                                       | 0                                                                                                                                                    | 1          | 0        | 0        | 0                | 0                | 0         | 0                | 0            | 0                | 1                | 0                | 0                | 0                | 0        | 0                |
| Blinding of data analysis                                                                                                      | NS                                                                        | NS                               | No                                                                                                                       | NS                                      | NS                                                                                                                                                   | NS         | NS       | NS       | NS               | NS               | NS        | NS               | NS           | NS               | NS               | NS               | NS               | NS               | NS       | NS               |
| Yes = 1, No = 0, NS=0                                                                                                          | 0                                                                         | 0                                | 0                                                                                                                        | 0                                       | 0                                                                                                                                                    | 0          | 0        | 0        | 0                | 0                | 0         | 0                | 0            | 0                | 0                | 0                | 0                | 0                | 0        | 0                |
| Intention to treat analysis                                                                                                    | NS                                                                        | Yes                              | Stated but not confirmed                                                                                                 | NS                                      | NS but confirmed                                                                                                                                     | NS         | NS       | NS       | NS but confirmed | NS but confirmed | NS        | NS but confirmed | NS           | NS but confirmed | NS but confirmed | NS but confirmed | NS but confirmed | NS but confirmed | NS       | NS but confirmed |
| Yes =1, Not stated but confirmed on study assessment =1, Stated but not confirmed on study assessment =0, No =0, Not stated =0 | 0                                                                         | 1                                | 0                                                                                                                        | 0                                       | 1                                                                                                                                                    | 0          | 0        | 0        | 1                | 1                | 0         | 1                | 0            | 1                | 1                | 1                | 1                | 1                | 0        | 1                |
| Completion of follow-up (at 6 months if poss)                                                                                  | 98%                                                                       | 100% in 3 months 92% at 6 months | 7 (1.8%) lost to follow-up, data on age or GCS missing/inaccurate for 17 (4.3%) patients => 24 (6.1%) patients excluded. | 100%                                    | 100%                                                                                                                                                 | 100%       | 100%     | 100%     | 100%             | 100%             | 100%      | 100%             | 90%          | 100%             | 100% at 3 months | 100%             | 100%             | 100%             | NS       | 89%              |
| 100% = 2, >95% = 1, <95% = 0, NS = 0                                                                                           | 1                                                                         | 2                                | 0                                                                                                                        | 2                                       | 2                                                                                                                                                    | 2          | 2        | 2        | 2                | 2                | 2         | 2                | 0            | 2                | 2                | 2                | 2                | 0                | 0        | 0                |
| Reasons given when patients were excluded from enrollment, allocation, follow up or analysis?                                  | No                                                                        | Yes                              | Yes                                                                                                                      | No                                      | Yes                                                                                                                                                  | No         | Yes      | No       | Yes              | Yes              | Yes       | No               | No           | No               | Yes              | Yes              | Yes              | Yes              | No       | Yes              |
| Yes = 1, No = 0, N/A = 1                                                                                                       | 0                                                                         | 1                                | 1                                                                                                                        | 0                                       | 1                                                                                                                                                    | 0          | 1        | 0        | 1                | 1                | 1         | 0                | 0            | 0                | 1                | 1                | 1                | 1                | 0        | 1                |
| TOTAL (Number of Domains)                                                                                                      | 8                                                                         | 11                               | 6                                                                                                                        | 9                                       | 8                                                                                                                                                    | 8          | 8        | 7        | 11               | 8                | 7         | 6                | 3            | 10               | 10               | 7                | 8                | 5                | 7        | 7                |
| MAXIMUM (Number of Domains)                                                                                                    | 15                                                                        | 15                               | 15                                                                                                                       | 15                                      | 15                                                                                                                                                   | 15         | 15       | 15       | 15               | 15               | 15        | 15               | 15           | 15               | 15               | 15               | 15               | 15               | 15       | 15               |

NS = Not stated
